# Supplementary material
Source: publisher site journal article supplement (https://www.dovepress.com/article/340189)
Supplement: Supplementary file 1 [file get_supplementary_file.php]

**Supplementary Table 1 Chinese expert consensus on diagnosis of SAP**

| At least 1 of the following: |
| --- |
| 1. Fever ( ≥ 38°C) with no other recognized cause |
| 2. Leukopenia (≤ 4 × 109 /L) or leukocytosis (≥ 10 × 109 /L) |
| 3. For adults ≥ 70 y old, altered mental status with no other recognized cause |
| And at least 2 of the following: |
| 1. New onset of purulent sputum, or change in character of sputum over a 24 h period, or increased respiratory secretions, or increased suctioning requirements |
| 2. New onset or worsening cough, or dyspnea, or tachypnea (respiratory rate > 25/min) |
| 3. Rales, crackles, or bronchial breath sounds |
| 4. Worsening gas exchange (eg, O2 desaturation [PaO2/FiO2 ≤ 300], increased oxygen requirements) |
| And chest radiographs with at least 1 of the following:  New or progressive infiltrate, consolidation, or ground glass opacity |

**Abbreviations:** PaO2, partial pressure oxygen; FiO2, fraction of inspired oxygen.
